# Supplementary material
Source: publisher figshare collection journal article supplement (https://karger.figshare.com/ndownloader/files/15458693)
Supplement: Supplementary file 1 [file 15458693]

(a)

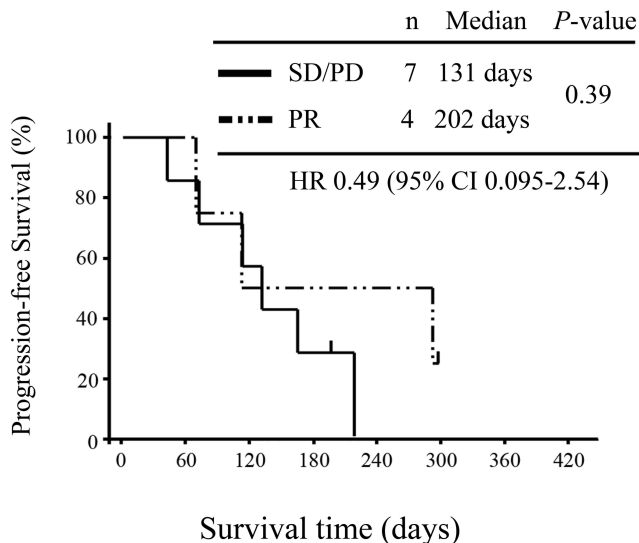

(b)

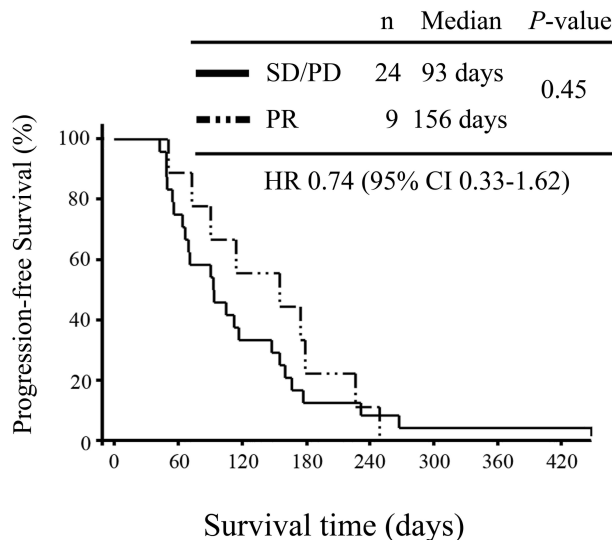

HR, hazard ratio; CI, confidence interval; PR, partial response; SD, stable disease; PD, progressive disease.

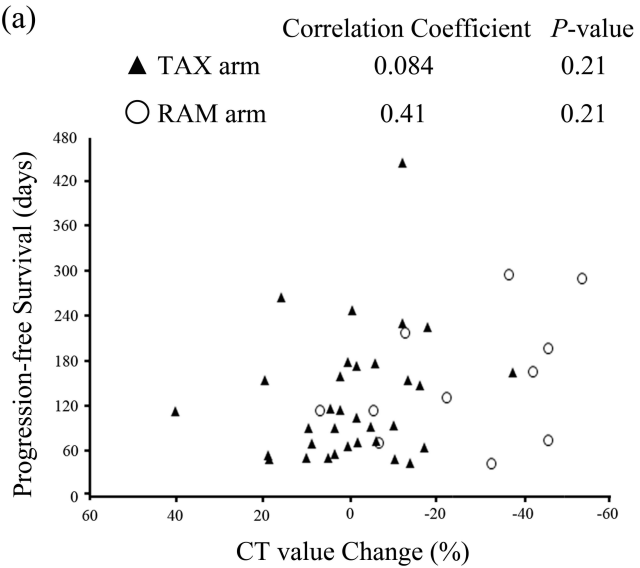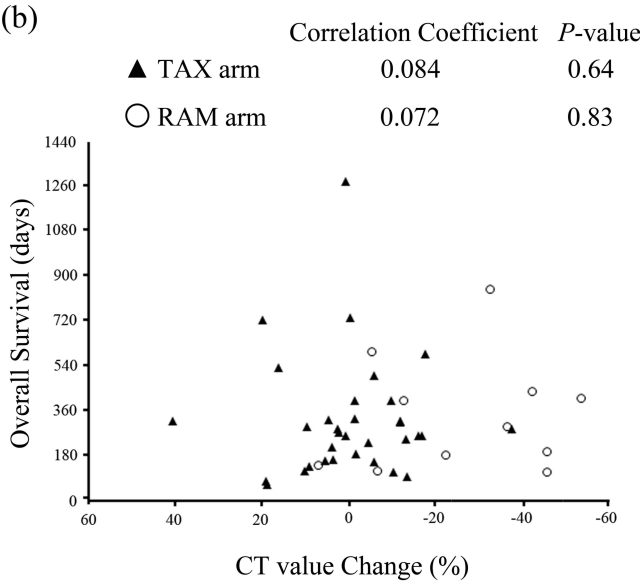

(a)

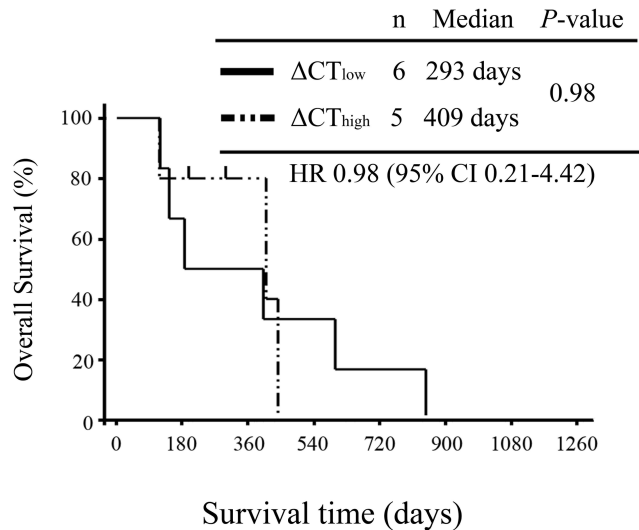

(b)

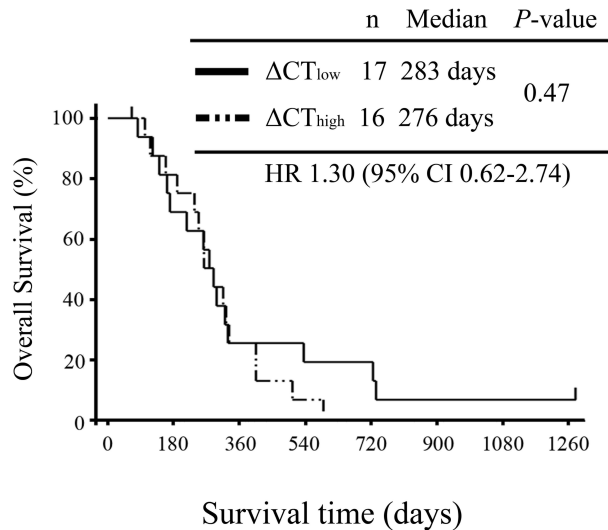

HR, hazard ratio; CI, confidence interval.

*Izawa et al.* Supplemental Figure 4

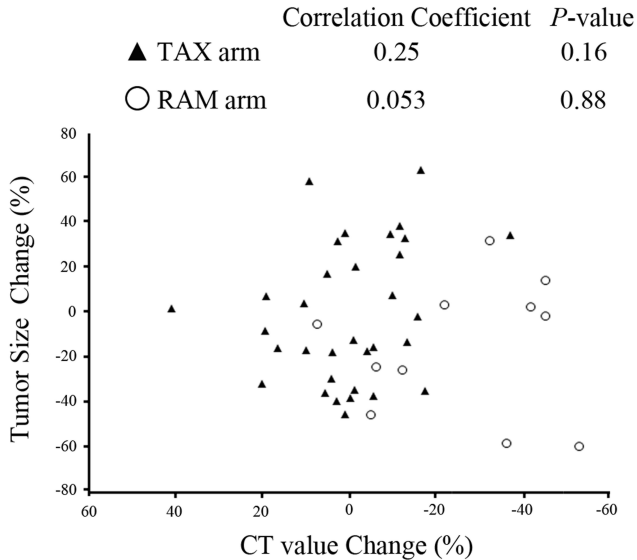

**Supplemental Figure Legends:**

**Supplemental Figure 1.** PFS estimated by RECIST version 1.1. A comparison of PFS (a) between patients showing PR and those showing SD/PD in the RAM arm. Similarly, a comparison of PFS (b) between patients showing PR and those with SD/PD in the TAX arm.

PFS, progression-free survival; PR, partial response; SD, stable disease; PD, progressive disease

**Supplemental Figure 2.** Scatter plot of CT value change and PFS (a), OS (b).

PFS, progression-free survival; OS, overall survival.

**Supplemental Figure 3.** OS estimated by CT value change. A comparison of OS (a) between patients showing high ( $\Delta CT_{high}$ ) and low rates of CT value change ( $\Delta CT_{low}$ ) in the RAM arm. Similarly, a comparison of OS (b) between patients showing  $\Delta CT_{high}$  and  $\Delta CT_{low}$  in the TAX arm.

PFS, progression-free survival; OS, overall survival.

**Supplemental Figure 4.** Scatter plot of CT value change and tumor size change.
